# Supplementary material for: Steering ammonia decomposition over Ru nanoparticles on ZrO2 by enhancing metal–support interaction
Source: Royal Society of Chemistry journal article supplement (doi:10.1039/d3cy00691c), 2023-01-01
Supplement: d3cy00691c1.pdf [file d3cy00691c1.pdf]

Electronic Supplementary Material (ESI) for Catalysis Science & Technology.  
This journal is © The Royal Society of Chemistry 2021

## Support information

### **Steering ammonia decomposition over Ru nanoparticles on ZrO<sub>2</sub> through enhancing metal-support interaction**

Tong Zhang,<sup>a,b,#</sup> Xiaohua Ju,<sup>c,#</sup> Lvyue Liu,<sup>a</sup> Lin Liu,<sup>c,d,\*</sup> Teng He,<sup>c,d</sup> Yunhua Xu,<sup>a,b</sup> Hanying Wang,<sup>b</sup> Ping Chen<sup>c,d</sup>

<sup>a</sup>*School of Material Science and Engineering, Xi'an University of Technology, Xi'an, 710048, China*

<sup>b</sup>*School of Energy Engineering, Yulin University, Yulin 719000, China*

<sup>c</sup>*Dalian National Laboratory for Clean Energy, State Key Laboratory of Catalysis, Dalian Institute of Chemical Physics, Chinese Academy of Sciences, Dalian 116023, China*

<sup>d</sup>*Center of Materials Science and Optoelectronics Engineering, University of Chinese Academy of Sciences, Beijing 100049, China*

*#These authors contributed equally to this work*

*E-mail: liulin@dicp.ac.cn*

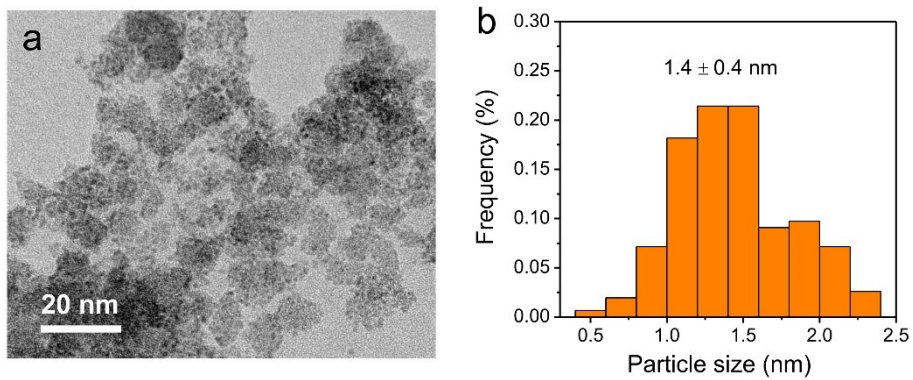

Fig. S1 TEM image (a) and particle size distribution (b) of RuO<sub>2</sub> NPs.

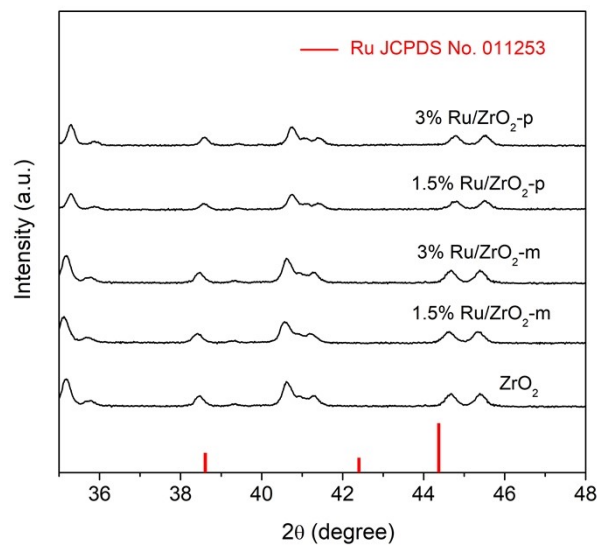

Fig. S2 Enlarged XRD patterns of ZrO<sub>2</sub>, 1.5% Ru/ZrO<sub>2</sub>-m, 3% Ru/ZrO<sub>2</sub>-m, 1.5% Ru/ZrO<sub>2</sub>-p and 3% Ru/ZrO<sub>2</sub>-p samples.

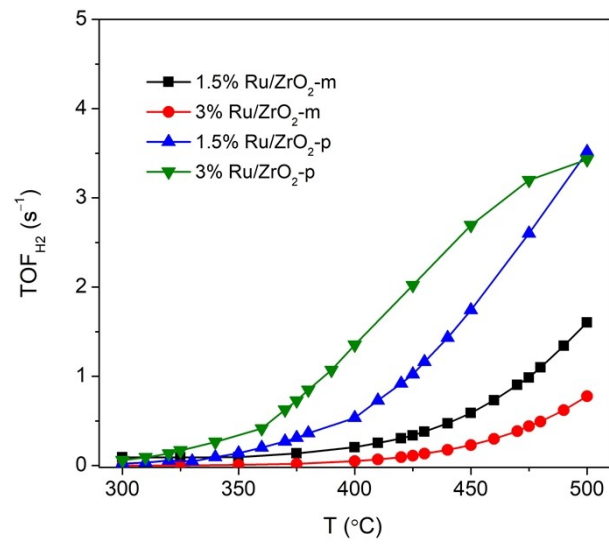

Fig. S3 TOF<sub>H<sub>2</sub></sub> values of 1.5% Ru/ZrO<sub>2</sub>-m, 3% Ru/ZrO<sub>2</sub>-m, 1.5% Ru/ZrO<sub>2</sub>-p and 3% Ru/ZrO<sub>2</sub>-p as a function of temperature.

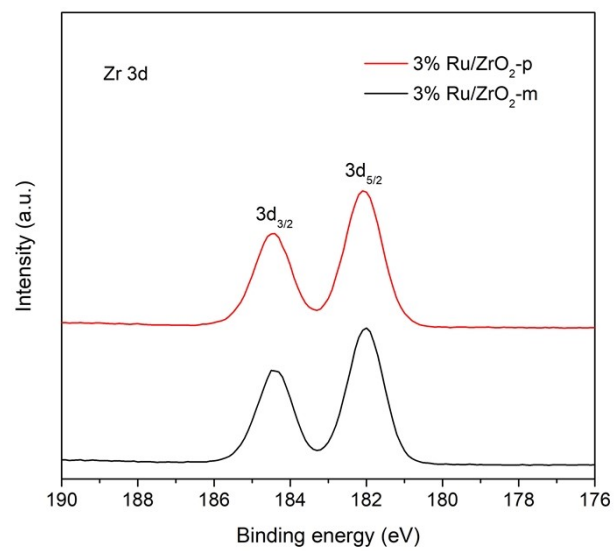

Fig. S4 Zr 3d core level XPS spectra of 3% Ru/ZrO<sub>2</sub>-m and 3% Ru/ZrO<sub>2</sub>-p catalysts.

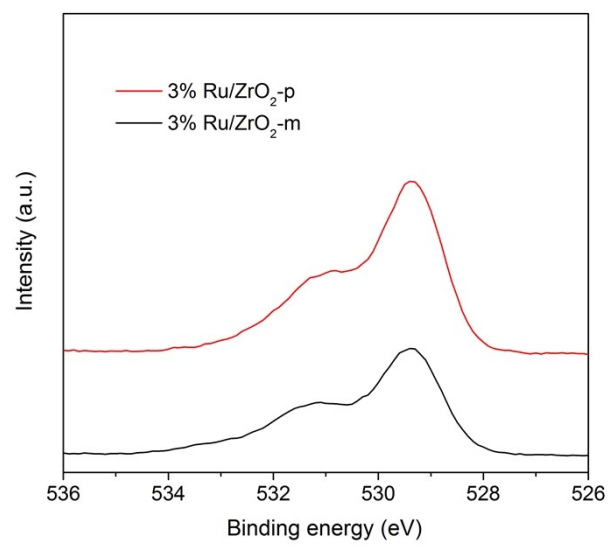

Fig. S5 O 1s core level XPS spectra of 3% Ru/ZrO<sub>2</sub>-m and 3% Ru/ZrO<sub>2</sub>-p catalysts.
